# Supplementary material
Source: HighWire-hosted journal article supplement (https://cmaj.ca/highwire/filestream/99472/field_highwire_adjunct_files/4/210873-res-5-at.pdf)

Supplementary Figure 2 – Intensive care unit admissions: Stratified analysis in 106 confirmed (bold font) and 126 probable (regular font) cases of MIS-C

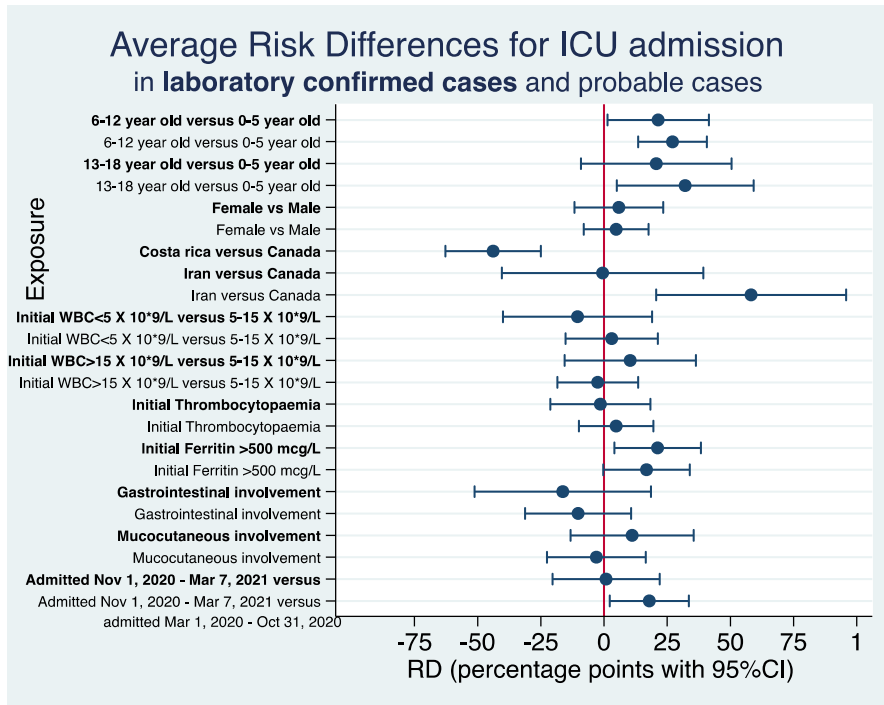

Supplement: 210873-res-5-at.pdf [file 210873-res-5-at.pdf]
